# Supplementary material for: Prognostic Factors for COVID-19 Hospitalized Patients with Preexisting Type 2 Diabetes
Source: Hindawi journal article supplement (doi:10.1155/2022/9322332), 2022-01-17
Supplement: f1 [file 9322332.f1.zip]

**Supplementary Table S1. Clinical characteristics of COVID-19 patients with and without T2D**

| <b>Variables</b>                            | <b>Total<br/>(N=382)</b> | <b>Non-diabetes<br/>(N=274)</b> | <b>Diabetes<br/>(N=108)</b> | <b>P value</b>    |
|---------------------------------------------|--------------------------|---------------------------------|-----------------------------|-------------------|
| <b>Characteristics</b>                      |                          |                                 |                             |                   |
| <b>Age (Median, IQR)</b>                    | 63(52-70)                | 60(48-67)                       | 68(61-75)                   | <b>&lt;0.0001</b> |
| <b>Sex</b>                                  |                          |                                 |                             | 0.72              |
| Female                                      | 189(49.48)               | 134(48.91)                      | 55(50.93)                   |                   |
| Male                                        | 193(50.52)               | 140(51.09)                      | 53(49.07)                   |                   |
| <b>Occupation</b>                           |                          |                                 |                             | <b>&lt;0.0001</b> |
| Employed                                    | 116(30.37)               | 103(37.59)                      | 13(12.04)                   |                   |
| Retired                                     | 161(42.15)               | 111(40.51)                      | 50(46.30)                   |                   |
| Unemployed                                  | 105(27.49)               | 60(21.90)                       | 45(41.66)                   |                   |
| <b>BMI</b>                                  |                          |                                 |                             | 0.07              |
| <25                                         | 275(80.17)               | 194(77.29)                      | 81(88.04)                   |                   |
| 25-30                                       | 55(16.03)                | 47(18.73)                       | 8(8.70)                     |                   |
| ≥30                                         | 13(3.79)                 | 10(3.98)                        | 3(3.26)                     |                   |
| <b>Smoking history</b>                      |                          |                                 |                             | 0.63              |
| No                                          | 342(89.53)               | 244(89.05)                      | 98(90.74)                   |                   |
| Yes                                         | 40(10.47)                | 30(10.95)                       | 10(9.26)                    |                   |
| <b>Onset time (Median, IQR)</b>             | 9(6-13)                  | 9(6-12)                         | 10(5-15)                    | 0.06              |
| <b>Use of hypnotics</b>                     |                          |                                 |                             | <b>0.016</b>      |
| No                                          | 258(75.00)               | 175(71.43)                      | 83(83.84)                   |                   |
| Yes                                         | 86(25.00)                | 70(28.57)                       | 16(16.16)                   |                   |
| <b>Signs and symptoms</b>                   |                          |                                 |                             |                   |
| Fever                                       | 306(80.10)               | 234(85.40)                      | 72(66.67)                   | <b>&lt;0.0001</b> |
| Cough                                       | 202(52.88)               | 135(49.27)                      | 67(62.04)                   | <b>0.024</b>      |
| Fever and Cough                             | 265(69.37)               | 207(75.55)                      | 58(53.70)                   | <b>&lt;0.0001</b> |
| Chest distress                              | 8(2.09)                  | 2(0.73)                         | 6(5.56)                     | <b>0.0076</b>     |
| Nausea and vomiting                         | 4(1.05)                  | 0                               | 4(1.05)                     | <b>0.0061</b>     |
| Dyspnea                                     | 17(4.55)                 | 15(4.38)                        | 2(4.63)                     | 1                 |
| <b>Coexisting conditions</b>                |                          |                                 |                             |                   |
| Any comorbidity                             | 138(36.31)               | 69(25.18)                       | 69(63.89)                   | <b>&lt;0.0001</b> |
| Cirrhosis                                   | 4(1.05)                  | 3(1.09)                         | 1(0.93)                     | 1                 |
| Hypertension                                | 144(37.70)               | 79(28.83)                       | 65(60.19)                   | <b>&lt;0.0001</b> |
| Cerebrovascular disease                     | 14(3.66)                 | 4(1.46)                         | 10(9.26)                    | <b>0.0008</b>     |
| Cardiovascular and cerebrovascular diseases | 48(12.57)                | 27(9.85)                        | 21(19.44)                   | <b>0.011</b>      |
| Digestive system disease                    | 24(6.28)                 | 16(5.84)                        | 8(7.41)                     | <b>0.57</b>       |
| Endocrine system disease                    | 30(7.85)                 | 7(2.55)                         | 23(21.30)                   | <b>&lt;0.0001</b> |
| Respiratory system disease                  | 32(8.30)                 | 25(9.12)                        | 7(6.48)                     | 0.4               |
| <b>Disease severity</b>                     |                          |                                 |                             | <b>&lt;0.0001</b> |
| Non-severe                                  | 160(41.88)               | 128(46.72)                      | 32(29.63)                   |                   |
| Severe                                      | 189(49.48)               | 132(48.18)                      | 57(52.78)                   |                   |
| Critical                                    | 33(8.64)                 | 14(5.11)                        | 19(17.59)                   |                   |
| <b>Outcome</b>                              |                          |                                 |                             | <b>0.033</b>      |

|                                                                                     |                    |                 |                 |                   |
|-------------------------------------------------------------------------------------|--------------------|-----------------|-----------------|-------------------|
| Alive                                                                               | 345(90.31)         | 253(92.34)      | 92(85.19)       |                   |
| Dead                                                                                | 37(9.69)           | 21(7.66)        | 16(14.81)       |                   |
| <b>Radiologic and laboratory findings</b>                                           |                    |                 |                 |                   |
| <b>Abnormalities on chest CT</b>                                                    |                    |                 |                 |                   |
| No GGO                                                                              | 22(5.76)           | 7(2.55)         | 15(13.89)       | <b>&lt;0.0001</b> |
| Local GGO                                                                           | 22(5.76)           | 12(4.38)        | 10(9.26)        | 0.065             |
| Bilateral GGO                                                                       | 191(50.00)         | 147(53.65)      | 44(40.74)       | <b>0.023</b>      |
| Combination of patchy ground glass opacity and pulmonary consolidation              | 69(18.06)          | 54(19.71)       | 15(13.89)       | 0.18              |
| Crazy paving sign                                                                   | 29(7.59)           | 21(7.66)        | 8(7.41)         | 0.93              |
| Diffuse patchy ground glass and air bronchogram                                     | 29(7.59)           | 16(5.84)        | 13(12.04)       | 0.039             |
| Bilateral multiple pulmonary consolidation and intralobular interstitial thickening | 10(2.62)           | 6(2.19)         | 4(3.70)         | 0.48              |
| <b>Laboratory findings</b>                                                          |                    |                 |                 |                   |
| <b>White blood cell count, 10<sup>9</sup>/L</b>                                     |                    |                 |                 | <b>0.011</b>      |
| <4                                                                                  | 98(26.92)          | 74(28.79)       | 24(22.43)       |                   |
| 4-10                                                                                | 240(65.93)         | 164(63.81)      | 76(71.03)       |                   |
| >10                                                                                 | 26(7.14)           | 19(7.39)        | 7(6.54)         |                   |
| <b>Neutrophil count , 10<sup>9</sup>/L</b>                                          |                    |                 |                 | <b>&lt;0.0001</b> |
| <40                                                                                 | 127(34.89)         | 60(23.35)       | 67(62.62)       |                   |
| 40-75                                                                               | 137(37.64)         | 118(45.91)      | 19(17.76)       |                   |
| >75                                                                                 | 100(27.47)         | 79(30.74)       | 21(19.63)       |                   |
| <b>Lymphocyte count, 10<sup>9</sup>/L</b>                                           |                    |                 |                 | <b>&lt;0.0001</b> |
| <20                                                                                 | 238(65.38)         | 147(57.20)      | 91(85.05)       |                   |
| 20-50                                                                               | 122(33.52)         | 106(41.25)      | 16(14.95)       |                   |
| >50                                                                                 | 4(1.10)            | 4(1.56)         | 0               |                   |
| <b>Monocyte count, 10<sup>9</sup>/L</b>                                             |                    |                 |                 | <b>&lt;0.0001</b> |
| <3                                                                                  | 160(44.20)         | 86(33.73)       | 74(69.16)       |                   |
| 3-10                                                                                | 160(44.20)         | 134(52.55)      | 26(24.30)       |                   |
| >10                                                                                 | 42(11.60)          | 35(13.73)       | 7(6.54)         |                   |
| <b>Platelet count, 10<sup>9</sup>/L</b>                                             |                    |                 |                 | 0.82              |
| <100                                                                                | 17(4.70)           | 11(4.31)        | 6(5.61)         |                   |
| 100-300                                                                             | 283(78.18)         | 195(48.04)      | 84(78.50)       |                   |
| >300                                                                                | 62(17.13)          | 45(17.65)       | 17(15.89)       |                   |
| <b>Alanine aminotransferase, U/L</b>                                                |                    |                 |                 | 0.11              |
| ≤7                                                                                  | 44(11.83)          | 36(13.48)       | 8(7.62)         |                   |
| 7-40                                                                                | 266(71.51)         | 183(68.54)      | 83(79.05)       |                   |
| >40                                                                                 | 62(16.67)          | 48(17.98)       | 14(13.33)       |                   |
| <b>Aspartate aminotransferase, U/L</b>                                              |                    |                 |                 | <b>0.029</b>      |
| <13                                                                                 | 50(13.40)          | 41(15.30)       | 9(8.57)         |                   |
| 13-35                                                                               | 227(60.86)         | 152(56.72)      | 75(71.43)       |                   |
| >35                                                                                 | 96(25.74)          | 75(27.99)       | 21(20.00)       |                   |
| <b>C-reactive protein level, mg/L</b>                                               | 26.7(8.0-62.6)     | 28.8(11.1-65.9) | 19.2(2.8-59.5)  | 0.37              |
| <b>Serum amyloid A (SAA) , mg/L</b>                                                 | 92.5(22.0-210.0)   | 115(34-210)     | 34(4-200)       | <b>0.0016</b>     |
| <b>Prothrombin time, s</b>                                                          | 11.9(11.1-13.0)    | 11.8(11.0-12.9) | 12.0(11.3-13.4) | 0.36              |
| <b>Activated partial thromboplastin time, s</b>                                     | 29.85(25.00-39.40) | 31.0(24.6-40.2) | 27.7(25.3-27.7) | 0.29              |
| <b>D-dimer, mg/L</b>                                                                | 0.38(0.01-1.73)    | 0.29(0.01-1.80) | 0.50(0.09-1.65) | 0.13              |

|                                               |                  |                 |                     |                   |
|-----------------------------------------------|------------------|-----------------|---------------------|-------------------|
| <b>Hypersensitive troponin I, pg/mL</b>       | 0.008(0-0.041)   | 0.008(0-0.059)  | 0.007(0.001-0.0225) | <b>0.011</b>      |
| <b>Creatine kinase–CMB, U/L</b>               | 39.0(4.05-72.5)  | 6.11(3.9-59.0)  | 49.0(30.0-82.0)     | 0.91              |
|                                               |                  |                 | 191.0(138.0-234.0)  | 0.39              |
| <b>Lactate dehydrogenase, U/L</b>             | 172.5(2.7-236.5) | 43.0(2.3-274.0) |                     |                   |
| <b>Total bilirubin, mmol/L</b>                | 10(7-15)         | 10(7-15)        | 11(8-16)            | 0.38              |
| <b>Blood urea nitrogen, mmol/L</b>            | 3.5(2.7-4.8)     | 4.6(3.3-6.9)    | 5.5(4.2-7.9)        | 0.16              |
| <b>Creatinine, µmol/L</b>                     | 63(48-79)        | 60(46-76)       | 68.5(52.0-87.0)     | <b>0.0023</b>     |
| <b>Procalcitonin, ng/mL</b>                   | 0.25(0.01-0.06)  | 0.03(0.01-0.07) | 0.02(0.01-0.06)     | <b>&lt;0.0001</b> |
| <b>Blood glucose, mmol/L</b>                  | 5.8(5.1-7.5)     | 5.5(4.9-6.4)    | 7.7(5.9-10.8)       | <b>&lt;0.0001</b> |
| <b>Glycated hemoglobin, mmol/mol</b>          |                  |                 |                     |                   |
| <b>Potassium, mmol/L</b>                      | 4.0(3.6-4.4)     | 3.9(3.5-4.3)    | 4.1(3.7-4.5)        | <b>0.0073</b>     |
| <b>Low-density lipoprotein (LDL), mmol/L</b>  | 2.31(1.88-2.96)  | 2.26(1.82-2.86) | 2.50(2.12-3.11)     | <b>0.047</b>      |
| <b>High-density lipoprotein (HDL), mmol/L</b> | 1.07(0.86-1.37)  | 1.09(0.86-1.33) | 1.04(0.88-1.30)     | 0.35              |
| <b>Treatment</b>                              |                  |                 |                     |                   |
| <b>Antiviral therapy</b>                      |                  |                 |                     |                   |
| Oseltamivir                                   | 244(64.04)       | 193(70.70)      | 51(47.22)           | <b>&lt;0.0001</b> |
| Ganciclovir                                   | 251(65.88)       | 191(69.96)      | 60(55.56)           | <b>0.0075</b>     |
| Arbidol                                       | 250(65.62)       | 180(65.93)      | 80(64.81)           | 0.83              |
| Kaletra                                       | 30(7.87)         | 18(6.59)        | 12(11.11)           | 0.14              |
| Interferon                                    | 22(5.76)         | 18(6.57)        | 4(3.70)             | 0.28              |
| <b>Antibiotic therapy</b>                     |                  |                 |                     |                   |
| Antibiotics                                   | 344(90.29)       | 259(94.87)      | 85(78.70)           | <b>&lt;0.0001</b> |
| <b>Steroid therapy</b>                        |                  |                 |                     |                   |
| Corticosteroid/Glucocorticoid                 | 196(60.49)       | 161(58.97)      | 35(68.63)           | 0.2               |
| <b>Oxygen support</b>                         |                  |                 |                     |                   |
| <b>Non-invasive ventilation</b>               |                  |                 |                     | <b>&lt;0.0001</b> |
| No                                            | 330(86.39)       | 251(91.61)      | 79(73.15)           |                   |
| Yes                                           | 52(13.61)        | 23(8.39)        | 29(26.85)           |                   |
| <b>Invasive ventilation</b>                   |                  |                 |                     | 0.52              |
| No                                            | 264(69.11)       | 192(70.07)      | 72(66.67)           |                   |
| Yes                                           | 118(30.89)       | 82(29.93)       | 36(33.33)           |                   |
| <b>Complications</b>                          |                  |                 |                     |                   |
| Acute cardiac injury                          | 44(11.52)        | 30(10.95)       | 14(12.96)           | 0.58              |
| Arrhythmia                                    | 28(7.35)         | 13(4.76)        | 15(13.89)           | <b>0.0021</b>     |
| ARDS*                                         | 105(27.49)       | 75(27.37)       | 30(27.78)           | 0.94              |
| Acute kidney injury                           | 13(3.41)         | 8(2.93)         | 5(4.63)             | 0.53              |
| Acute renal injury                            | 17(4.46)         | 11(4.03)        | 6(5.56)             | 0.52              |
| Septic shock                                  | 19(4.99)         | 8(2.93)         | 11(10.19)           | <b>0.0034</b>     |
| Secondary infection                           | 10(2.62)         | 5(1.83)         | 5(4.63)             | 0.15              |

\*ARDS, Acute respiratory distress syndrome

**Supplementary Table S2. Clinical characteristics between survivors and non-survivors in COVID-19 patients with T2D**

| Variables                                   | Total<br>(N=108) | Non-survivor<br>(N=16) | Survivor<br>(N=92) | P Value |
|---------------------------------------------|------------------|------------------------|--------------------|---------|
| <b>Characteristics</b>                      |                  |                        |                    |         |
| Age, y                                      | 68(61-75)        | 74(65-89)              | 67(60-73)          | 0.017   |
| Age at diagnosed with diabetes, y           | 60(52-66)        | 62(56-67)              | 60(51-66)          | 0.14    |
| Duration of diabetes, y                     | 8(4-13)          | 10(6-20)               | 8(4-12)            | 0.051   |
| <b>Sex</b>                                  |                  |                        |                    | 0.53    |
| Female                                      | 55(50.9)         | 7(43.8)                | 48(52.2)           |         |
| Male                                        | 53(49.1)         | 9(56.2)                | 44(47.8)           |         |
| <b>Occupation</b>                           |                  |                        |                    | 0.17    |
| Employed                                    | 13(12.0)         | 1(6.3)                 | 12(13.0)           |         |
| Retired                                     | 50(46.3)         | 11(68.7)               | 39(42.4)           |         |
| Unemployed                                  | 45(41.7)         | 4(25.0)                | 41(44.6)           |         |
| <b>BMI</b>                                  |                  |                        |                    | 0.053   |
| <25                                         | 81(88.0)         | 12(85.7)               | 69(88.5)           |         |
| 25-30                                       | 8(8.7)           | 0                      | 8(10.2)            |         |
| ≥30                                         | 3(3.3)           | 2(14.3)                | 1(1.3)             |         |
| <b>Smoking history</b>                      |                  |                        |                    | 0.16    |
| No                                          | 98(90.7)         | 13(81.3)               | 85(92.4)           |         |
| Yes                                         | 10(9.3)          | 3(18.7)                | 7(7.6)             |         |
| <b>Onset time, d</b>                        | 10(5-15)         | 8(4-11)                | 10(6-15)           | 0.032   |
| <b>Disease severity</b>                     |                  |                        |                    | 0.0003  |
| Non-severe                                  | 32(29.6)         | 2(12.5)                | 30(32.6)           |         |
| Severe                                      | 57(52.8)         | 5(31.3)                | 52(56.5)           |         |
| Critical                                    | 19(17.6)         | 9(56.2)                | 10(10.9)           |         |
| <b>Signs and symptoms</b>                   |                  |                        |                    |         |
| Fever                                       | 72/108(66.7)     | 9/16(56.3)             | 63/92(68.5)        | 0.34    |
| Cough                                       | 67/108(62.0)     | 9/16(56.3)             | 58/92(63.0)        | 0.59    |
| Fever and Cough                             | 50/108(53.7)     | 7/16(43.7)             | 51/92(55.4)        | 0.43    |
| Chest distress                              | 6/108(5.6)       | 2/16(12.5)             | 4/92(4.4)          | 0.21    |
| Nausea and vomiting                         | 4/108(3.7)       | 1/16(6.3)              | 3/92(85.2)         | 0.48    |
| Dyspnea                                     | 5/108(4.6)       | 0/16(0)                | 5/92(5.4)          |         |
| <b>Coexisting conditions</b>                |                  |                        |                    |         |
| Any comorbidity                             | 69/108(63.9)     | 14/16(87.5)            | 55/92(59.8)        | 0.033   |
| Cirrhosis                                   | 1/108(0.9)       | 1/16(6.3)              | 0/92(0)            | 0.29    |
| Hypertension                                | 65/108(60.2)     | 10/16(62.5)            | 55/92(59.8)        | 1       |
| Cerebrovascular disease                     | 10/108(9.3)      | 0/16(0)                | 10/92(10.9)        | 0.35    |
| Cardiovascular and cerebrovascular diseases | 21/108(19.4)     | 8/16(50.0)             | 13/92(14.1)        | 0.0027  |
| Digestive system disease                    | 8/108(7.4)       | 4/16(25.0)             | 4/92(4.4)          | 0.016   |
| Endocrine system disease                    | 23/108(21.3)     | 1/16(6.3)              | 22/92(23.9)        | 0.18    |
| Respiratory system disease                  | 7/108(6.5)       | 3/16(18.8)             | 4/92(4.4)          | 0.065   |
| <b>Radiologic and laboratory findings</b>   |                  |                        |                    |         |
| <b>Radiologic findings</b>                  |                  |                        |                    |         |
| <b>Abnormalities on chest CT</b>            |                  |                        |                    |         |

|                                                                                     |                    |                  |                  |         |
|-------------------------------------------------------------------------------------|--------------------|------------------|------------------|---------|
| No GGO                                                                              | 15/108(13.9)       | 1/16(6.3)        | 14/92(15.2)      | 0.46    |
| Local GGO                                                                           | 10/108(9.3)        | 0/16(0)          | 10/92(10.9)      | 0.35    |
| Bilateral GGO                                                                       | 44/108(40.7)       | 6/16(37.5)       | 38/92(41.3)      | 1       |
| Combination of patchy ground glass opacity and pulmonary consolidation              | 15/108(13.9)       | 0/16(0)          | 15/92(16.3)      | 0.12    |
| Crazy waving sign                                                                   | 8/108(7.4)         | 3/16(18.8)       | 5/92(5.4)        | 0.095   |
| Diffuse patchy ground glass and air bronchogram                                     | 13/108(12.0)       | 1/16(6.3)        | 12/92(13.0)      | 0.69    |
| Bilateral multiple pulmonary consolidation and intralobular interstitial thickening | 4/108(3.7)         | 2/16(12.5)       | 2/92(2.7)        | 0.1     |
| <b>Laboratory findings</b>                                                          |                    |                  |                  |         |
| <b>White blood cell count, 10<sup>9</sup>/L</b>                                     |                    |                  |                  | 0.011   |
| <4                                                                                  | 24(22.4)           | 3(20.0)          | 21(22.8)         |         |
| 4-10                                                                                | 76(71.0)           | 8(53.3)          | 68(73.9)         |         |
| >10                                                                                 | 7(6.5)             | 4(26.7)          | 3(3.3)           |         |
| <b>Neutrophil count, 10<sup>9</sup>/L</b>                                           |                    |                  |                  | 0.0029  |
| <40                                                                                 | 67(62.6)           | 5(33.3)          | 62(67.4)         |         |
| 40-75                                                                               | 19(17.8)           | 2(13.3)          | 17(18.5)         |         |
| >75                                                                                 | 21(19.6)           | 8(53.4)          | 13(14.1)         |         |
| <b>Lymphocyte count, 10<sup>9</sup>/L</b>                                           |                    |                  |                  | 0.46    |
| <20                                                                                 | 91(85.1)           | 14(93.3)         | 77(83.7)         |         |
| 20-50                                                                               | 16(14.9)           | 1(6.7)           | 15(16.3)         |         |
| <b>Monocyte count, 10<sup>9</sup>/L</b>                                             |                    |                  |                  | 0.39    |
| <3                                                                                  | 74(69.2)           | 9(60.0)          | 65(70.7)         |         |
| 3-10                                                                                | 26(24.3)           | 4(26.7)          | 22(23.9)         |         |
| >10                                                                                 | 7(6.5)             | 2(13.3)          | 5(5.4)           |         |
| <b>Platelet count, 10<sup>9</sup>/L</b>                                             |                    |                  |                  | 0.036   |
| <100                                                                                | 6(5.6)             | 3(20.0)          | 3(3.3)           |         |
| 100-300                                                                             | 84(78.5)           | 9(60.0)          | 75(81.5)         |         |
| >300                                                                                | 17(15.9)           | 3(20.0)          | 14(15.2)         |         |
| <b>Alanine aminotransferase, U/L</b>                                                |                    |                  |                  | 0.21    |
| ≤7                                                                                  | 8(7.6)             | 0                | 8(8.9)           |         |
| 7-40                                                                                | 83(79.1)           | 11(73.3)         | 72(80.0)         |         |
| >40                                                                                 | 14(13.3)           | 4(26.7)          | 10(11.1)         |         |
| <b>Aspartate aminotransferase, U/L</b>                                              |                    |                  |                  | <0.0001 |
| <13                                                                                 | 9(8.6)             | 0                | 9(10.0)          |         |
| 13-35                                                                               | 75(71.4)           | 5(33.3)          | 70(77.8)         |         |
| >35                                                                                 | 21(20.0)           | 10(66.7)         | 11(12.2)         |         |
| <b>C-reactive protein, mg/L</b>                                                     | 19.2(2.8-59.5)     | 94.85(48-146.75) | 15.2(2.4-45)     | <0.0001 |
| <b>Serum amyloid A (SAA), mg/L</b>                                                  | 34(4-200)          | 210(200-250)     | 153(2-153.5)     | <0.0001 |
| <b>Prothrombin time, s</b>                                                          | 12(11.3-13.4)      | 12.05(11.1-12.8) | 12(10.7-13.4)    | 0.2     |
| <b>Activated partial thromboplastic time, s</b>                                     | 27.7(25.3-34.2)    | 35.35(18.20-57)  | 26.9(25.1-30.8)  | 0.0044  |
| <b>D-dimer, mg/L</b>                                                                | 0.5(0.09-1.65)     | 0.33(0.01-3.54)  | 0.5(0.13-1.56)   | 0.011   |
| <b>Hypersensitive troponin I, pg/mL</b>                                             | 0.007(0.001-0.023) | 0.039(0.01-0.13) | 0.001(0-0.017)   | 0.18    |
| <b>Creatine kinase–CMB, U/L</b>                                                     | 49(30-82)          | 40(12.7-122.5)   | 51(34.0-81.5)    | 0.24    |
| <b>Lactate dehydrogenase, U/L</b>                                                   | 191(138-234)       | 232(223-525)     | 176(136.5-228.5) | 0.0011  |
| <b>Total bilirubin, mmol/L</b>                                                      | 11(8-16)           | 12(8-18)         | 11(8-14)         | 0.62    |
| <b>Blood urea nitrogen, mmol/L</b>                                                  | 5.45(4.15-7.85)    | 7.9(6.1-10.2)    | 5.1(4.0-6.7)     | 0.18    |

|                                               |                 |                 |                 |         |
|-----------------------------------------------|-----------------|-----------------|-----------------|---------|
| <b>Creatinine, µmol/L</b>                     | 68.5(52-87)     | 74(66-116)      | 68(49-86)       | 0.026   |
| <b>Procalcitonin, ng/mL</b>                   | 0.02(0.01-0.06) | 0.05(0.02-0.23) | 0.02(0.01-0.05) | 0.35    |
| <b>Blood glucose, mmol/L</b>                  | 7.7(5.9-10.8)   | 11.5(5.4-18.3)  | 7.6(6.1-9.5)    | 0.05    |
| <b>Glycated hemoglobin, mmol/mol</b>          | 7.5(6.5-8.6)    | 7.7(6.6-8.6)    | 7.5(6.5-8.6)    | 0.73    |
| <b>Potassium, mmol/L</b>                      | 4.1(3.7-4.5)    | 4.2(3.4-4.6)    | 4.1(3.7-4.5)    | 0.47    |
| <b>Low-density lipoprotein (LDL), mmol/L</b>  | 2.5(2.1-3.1)    | 2.3(2.1-2.8)    | 2.6(2.1-3.2)    | 0.012   |
| <b>High-density lipoprotein (HDL), mmol/L</b> | 1.04(0.9-1.3)   | 1.05(0.8-1.2)   | 1.03(0.9-1.3)   | 0.013   |
| <b>Treatments</b>                             |                 |                 |                 |         |
| <b>Diabetes treatment</b>                     |                 |                 |                 | <0.0001 |
| Oral medication plus insulin                  | 15(13.9)        | 2(12.5)         | 13(14.1)        |         |
| Oral medication only                          | 65(60.2)        | 2(12.5)         | 63(68.5)        |         |
| Insulin only                                  | 28(25.9)        | 12(75.0)        | 16(17.4)        |         |
| <b>Antiviral therapy</b>                      |                 |                 |                 |         |
| Oseltamivir                                   | 51/108(47.2)    | 12/16(75.0)     | 39/92(85.2)     | 0.028   |
| Ganciclovir                                   | 60/108(55.6)    | 14/16(87.5)     | 46/92(50.0)     | 0.0059  |
| Arbidol                                       | 70/108(64.8)    | 7/16(43.8)      | 63/92(68.5)     | 0.056   |
| Kaletra                                       | 12/108(11.1)    | 4/16(25.0)      | 8/92(8.7)       | 0.077   |
| Interferon                                    | 4/108(3.7)      | 2/16(12.5)      | 2/92(2.2)       | 0.1     |
| <b>Antibiotic therapy</b>                     |                 |                 |                 |         |
| Antibiotics                                   | 85/108(78.7)    | 16/16(100)      | 69/92(75.0)     | 0.021   |
| <b>Steroid therapy</b>                        |                 |                 |                 |         |
| Corticosteroid/Glucocorticoid                 | 35/95(36.9)     | 13/15(86.7)     | 22/80(27.5)     | <0.0001 |
| <b>Oxygen support</b>                         |                 |                 |                 |         |
| <b>Non-invasive ventilation</b>               |                 |                 |                 | <0.0001 |
| No                                            | 79(73.2)        | 4(25.0)         | 75(81.5)        |         |
| Yes                                           | 29(26.8)        | 12(75.0)        | 17(18.5)        |         |
| <b>Invasive ventilation</b>                   |                 |                 |                 | <0.0001 |
| No                                            | 72(66.7)        | 2(12.5)         | 70(76.1)        |         |
| Yes                                           | 36(33.3)        | 14(87.5)        | 22(23.9)        |         |
| <b>Complication</b>                           |                 |                 |                 |         |
| Any complication                              | 33(30.5)        | 17(18.5)        | 16(100)         | <0.0001 |
| Acute cardiac injury                          | 14/108(13.0)    | 10/16(62.5)     | 4/92(4.4)       | <0.0001 |
| Arrhythmia                                    | 15/108(13.9)    | 8/16(50.0)      | 7/92(7.6)       | 0.0001  |
| ARDS*                                         | 30/108(27.8)    | 15/16(93.6)     | 15/92(16.3)     | <0.0001 |
| Acute kidney injury                           | 5/108(4.6)      | 2/16(12.5)      | 3/92(3.3)       | 0.16    |
| Septic shock                                  | 11/108(10.2)    | 8/16(50.0)      | 3/92(3.3)       | <0.0001 |
| Secondary infection                           | 5/108(4.6)      | 5/16(31.3)      | 0/92(0)         | <0.0001 |

\* Acute respiratory distress syndrome

**Fig. S1**

**A1**

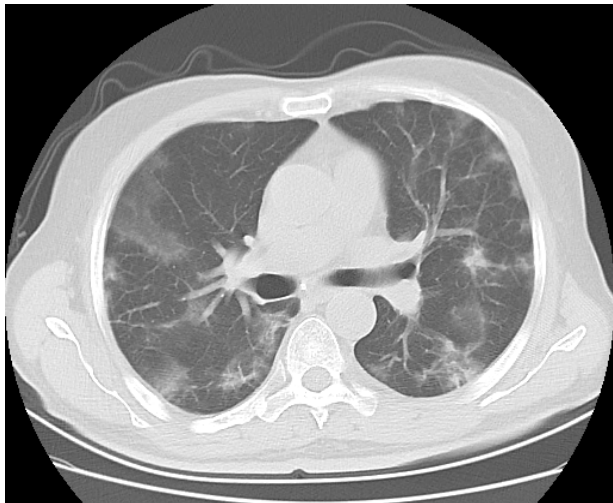

**A2**

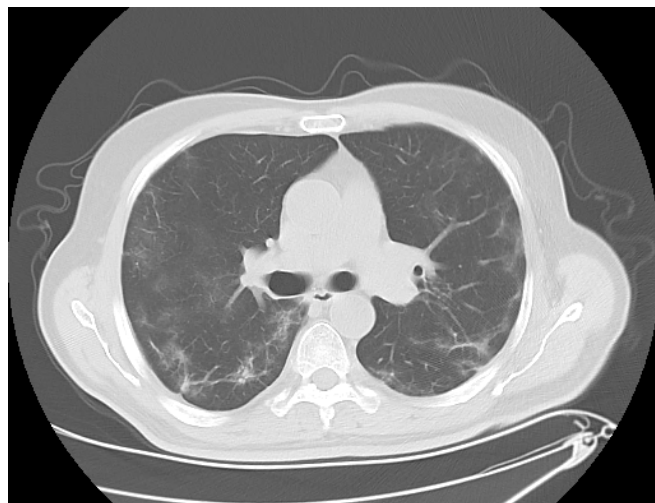

**B1**

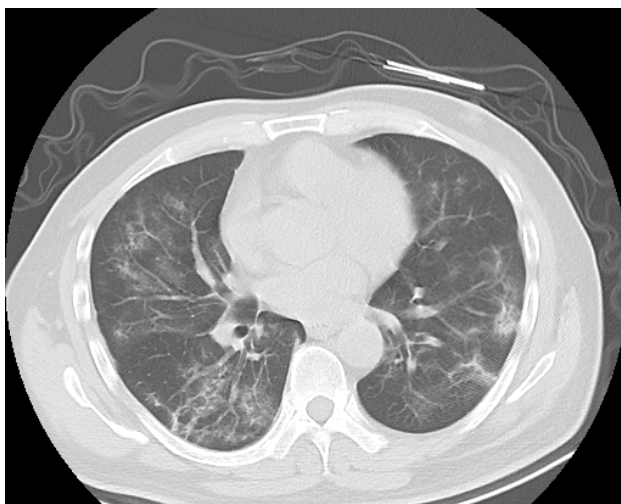

**B2**

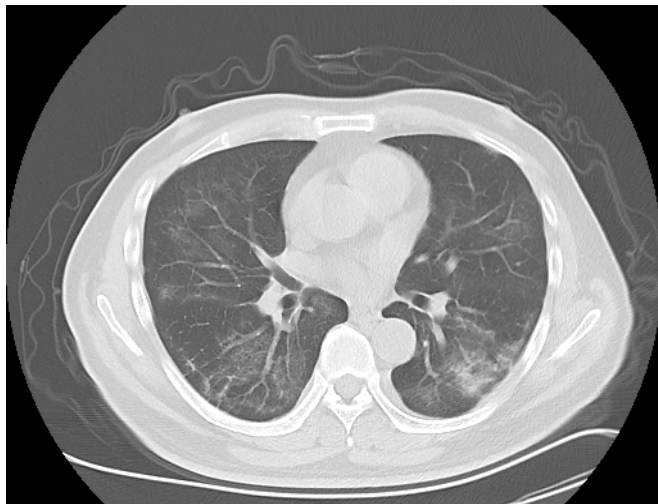

**C1**

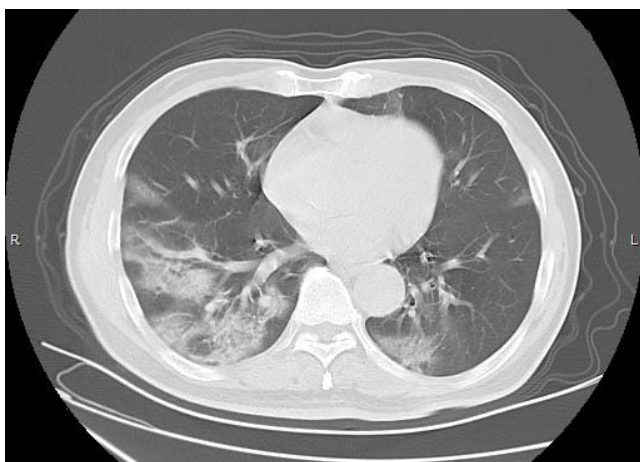

**C2**

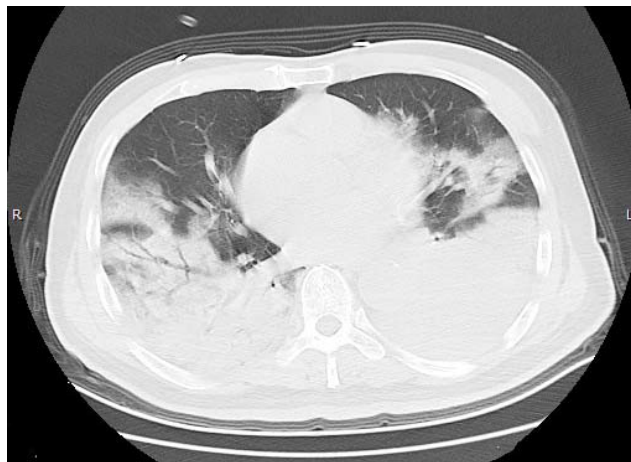

Fig. S2

A

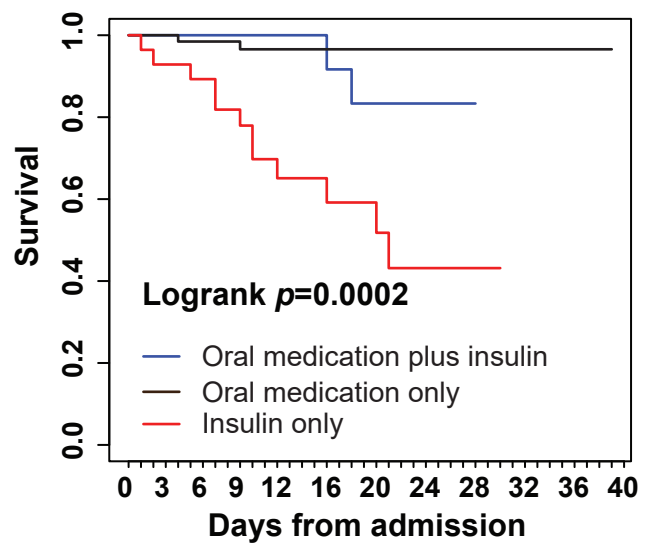



Fig. S3

A

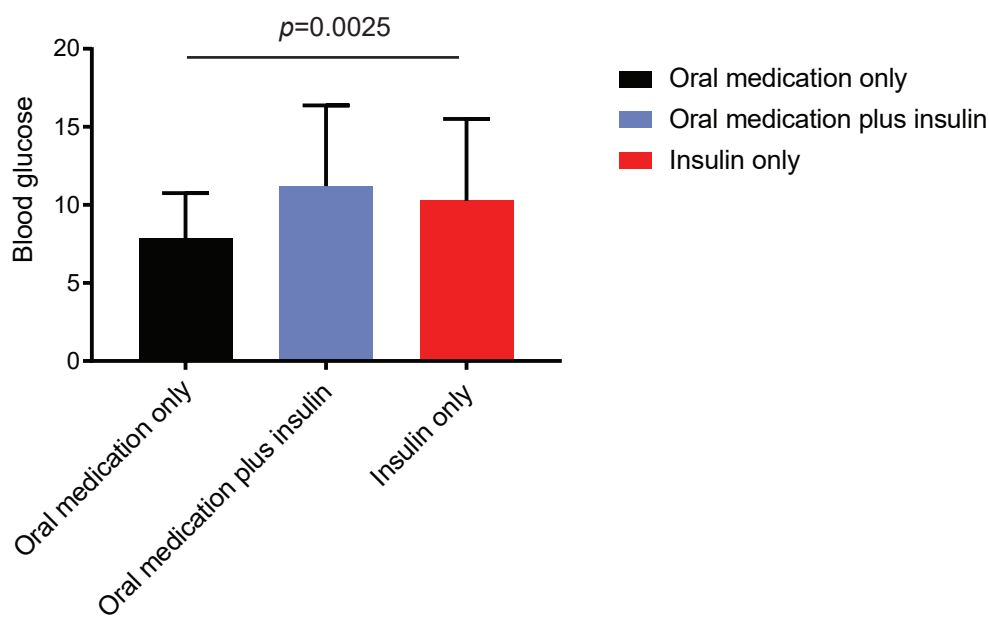

## **Supplementary Figure Legends**

### **Fig. S1 Representative dynamic changes in chest computer tomography (CT) scans between admission and discharge for the three diabetes treatment groups**

(A1-A2) CT images of a 65-year-old male patient, whose blood glucose at admission was 9.4 mmol/L, and treated with metformin during hospitalization. A1 (day 1): lungs showed patchy ground glass shadows, and the internal blood vessels were running naturally; A2 (day 12): lung lesions were less and the boundary was clearer than before. (B1-B2) CT images of a 60-year-old male patient, whose blood glucose at admission was 8 mmol/L, and treated with acarbose and insulin during hospitalization. B1 (day1): lungs showed scattered patchy, cord shape fuzzy shadow, some parts showing ground glass density; B2 (day 12): density of lung lesions were decreased. (C1-C2) CT images of a 55-year-old male patient, whose blood glucose at admission was 18.1 mmol/L, treated with insulin during hospitalization, and died. C1 (day1): both lungs showed scattered patchy ground glass shadows, some lesions were consolidated, and air bronchi signs were seen inside; C2 (day 4): foci of the two lung diseases were more advanced, and most of the lesions were solid, with air bronchi signs inside and a small amount of effusion in the left thoracic cavity.

### **Fig. S2 Survival analysis for three diabetes treatment groups**

(A) Kaplan-Meier curves demonstrating survival of COVID-19 patients with T2D by diabetes treatment. *P* values for survival analysis were derived by the log-rank test.

### **Fig. S3 Blood glucose level on three diabetes treatment groups**

(A) Distribution of blood glucose in three diabetes treatment groups was significantly different (Mean±SD,  $p=0.0025$ ).
