# Supplementary figures and images for: Prognostic Factors for COVID-19 Hospitalized Patients with Preexisting Type 2 Diabetes
Source: Hindawi journal article supplement (doi:10.1155/2022/9322332), 2022-01-17

Fig. S3

A

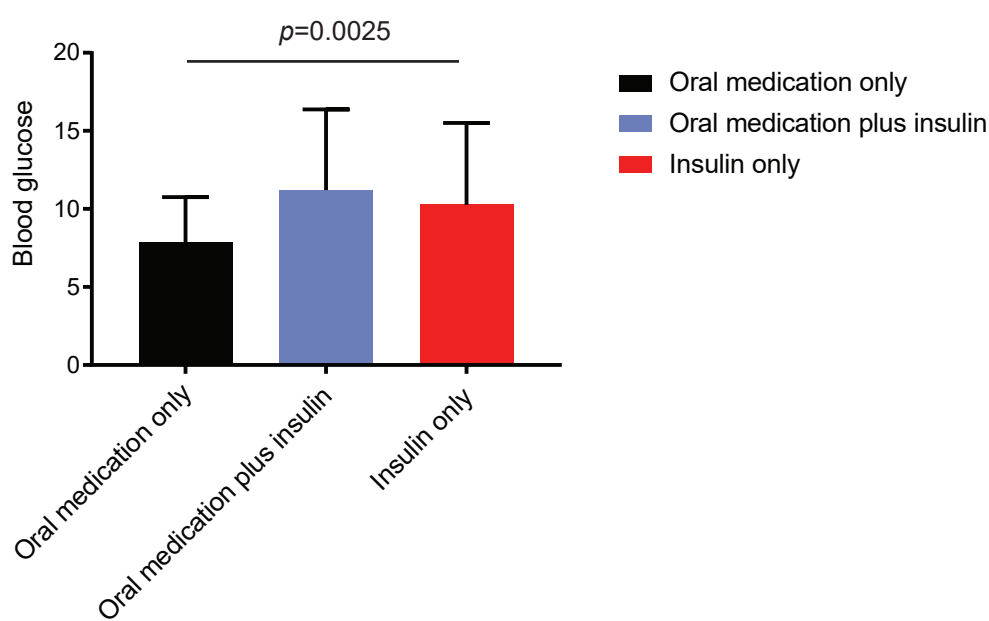

Supplement: f1 [file 9322332.f1.zip]

**Fig. S1**

**A1**

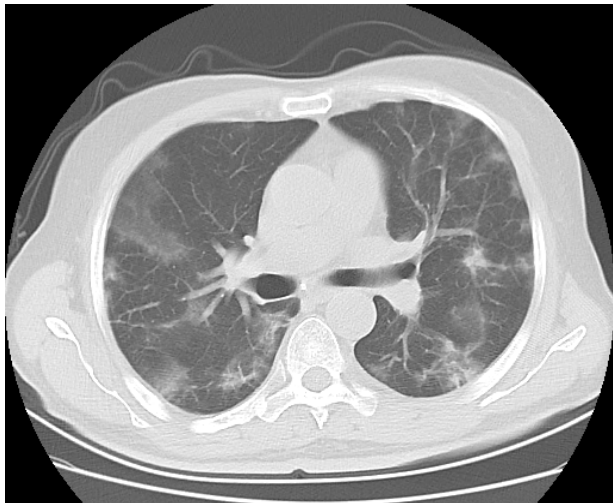

**A2**

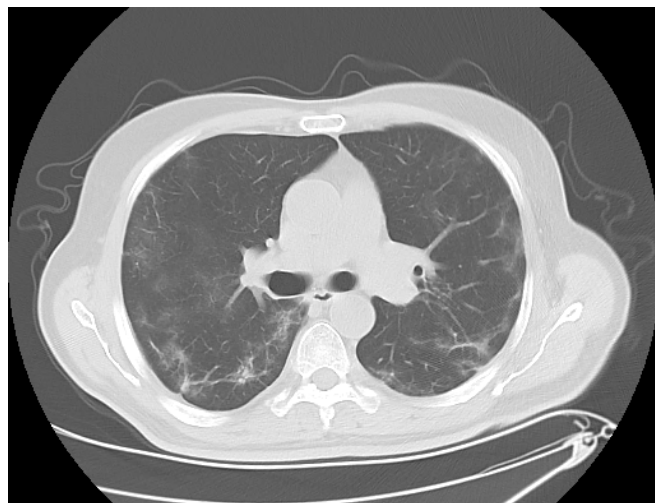

**B1**

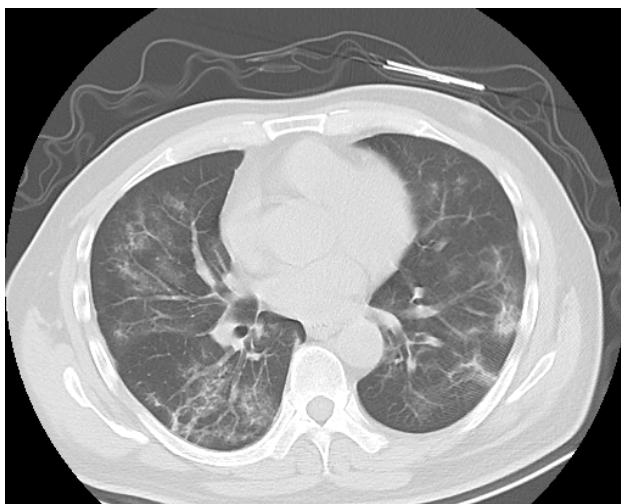

**B2**

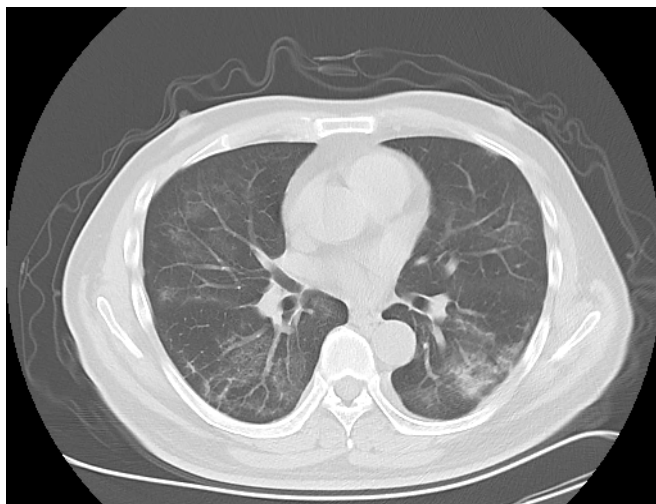

**C1**

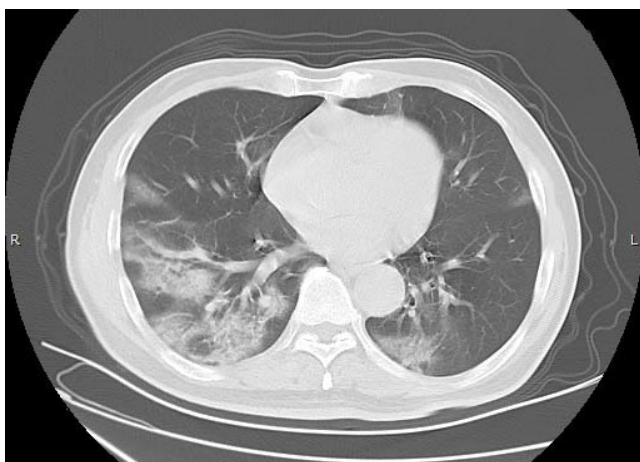

**C2**

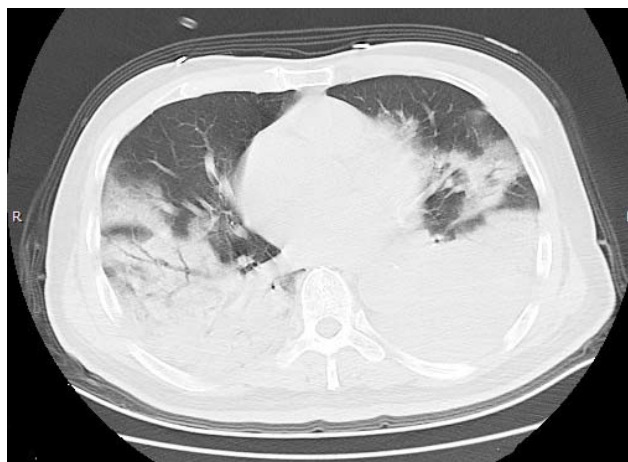

Supplement: f1 [file 9322332.f1.zip]

Fig. S2

A

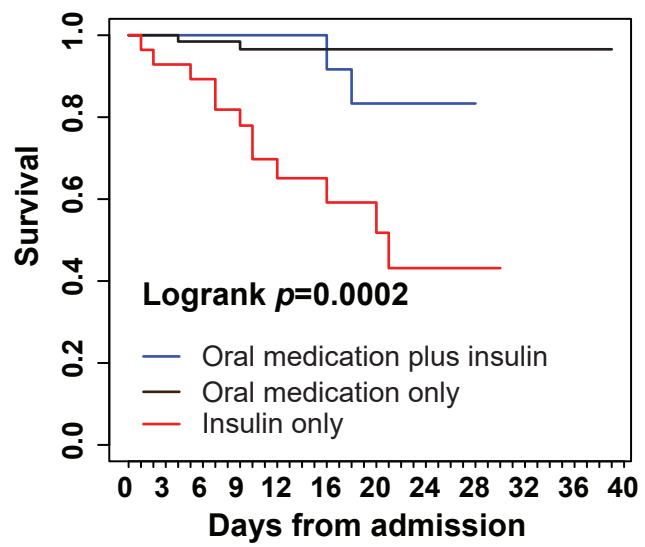

Supplement: f1 [file 9322332.f1.zip]
